# Supplementary material
Source: publisher site journal article supplement (https://www.dovepress.com/article/313470)
Supplement: Supplementary file 1 [file get_supplementary_file.php]

Supplemental Materials Appendix 1: *Coding of Bullying-Related Characteristics*

| Characteristic of Bullying Victimization | Definition |
| --- | --- |

| Type  Frequency  Stability  Developmental stage | Type of bullying victimization based on the dimensions identified by Mynard and Joseph;[[1]](#footnote-1) namely, (1) physical victimization (with an additional code for the presence/absence of bodily harm and documentation of the specific type of injury, eg, fracture, laceration, bruising), (2) verbal victimization, (3) relational victimization, and (4) attacks on property. When different types of bullying were combined in a single measure, we coded it as (5) unclear.  Frequent victimization was defined as victimization that occurred at least weekly or was rated as occurring “often” or “frequently.”  Stable/prolonged bullying victimization was defined as victimization that persisted for at least six months or was reported to be present at two measurement points spaced at least six months apart.  We defined early childhood as age up to 5 years, middle childhood as age 6 to 10 years, and adolescence as 11 to 18 years. |
| --- | --- |

Supplemental Materials Appendix 2

Search Terms and Yields for Review of Bullying Victimization and Chronic Pain

Database: Ovid MEDLINE: Epub Ahead of Print, In-Process & Other Non-Indexed Citations, Ovid MEDLINE® Daily and Ovid MEDLINE® <1946-Present>

Search Strategy:

--------------------------------------------------------------------------------

1 Bullying/ (2931)

2 bully$.ti,ab. (4307)

3 bullie?.ti,ab. (1426)

4 cyberbull$.ti,ab. (447)

5 cyber-bull$.ti,ab. (82)

6 cyberharass$.ti,ab. (4)

7 cyber-harass$.ti,ab. (7)

8 frozen out.ti,ab. (80)

9 freeze? out.ti,ab. (157)

10 freezing out.ti,ab. (86)

11 tease?.ti,ab. (2093)

12 teasing.ti,ab. (1094)

13 taunt$.ti,ab. (123)

14 Social Isolation/ (12391)

15 Social Distance/ (2428)

16 (social$ adj2 exclusion?).ti,ab. (1444)

17 (social$ adj2 exclud$).ti,ab. (302)

18 victimization?.ti,ab. (6845)

19 victimisation?.ti,ab. (457)

20 victimi?ed.ti,ab. (1396)

21 (physical$ adj2 assault$).ti,ab. (1133)

22 Sibling relations/ (2729)

23 ostraci$.ti,ab. (525)

24 Harassment, Non-Sexual/ (25)

25 (harass$ not sexual$).ti,ab. (1404)

26 or/1-25 (36298)

27 Chronic Pain/ (10359)

28 (chronic adj3 pain).ti,ab. (53977)

29 Chronic Disease/ (249746)

30 chronic disease?.ti,ab. (53189)

31 chronic condition?.ti,ab. (14749)

32 Pain/ (125774)

33 pain?.ti,ab. (556985)

34 Pain/ep, et, px [Epidemiology, Etiology, Psychology] (53195)

35 Pain, intractable/ (6051)

36 Fibromyalgia/ (7727)

37 fibromyalgia.ti,ab. (9084)

38 Irritable Bowel Syndrome/ (6294)

39 irritable bowel syndrome.ti,ab. (11285)

40 IBS.ti,ab. (7549)

41 Arthritis/ (34431)

42 arthritis.ti,ab. (157900)

43 exp back pain/ (35555)

44 neck pain/ (6103)

45 Osteoarthritis/ (34125)

46 osteoarthritis.ti,ab. (53125)

47 Arthritis, Rheumatoid/ (93448)

48 Headache/ (25996)

49 (headache? or head-ache?).ti,ab. (75386)

50 Migraine/ (23361)

51 migraine?.ti,ab. (30950)

52 Neuralgia, Postherpetic/ (929)

53 postherpetic neuralgia.ti,ab. (1797)

54 post-herpetic neuralgia.ti,ab. (770)

55 Herpes Zoster/ (9655)

56 herpes zoster.ti,ab. (8374)

57 shingles.ti,ab. (1135)

58 Complex Regional Pain Syndromes/ (1242)

59 complex regional pain syndrome?.ti,ab. (2642)

60 Somatoform Disorders/ (8939)

61 (somat$ adj3 pain).ti,ab. (1987)

62 stomachache?.ti,ab. (292)

63 stomach ache?.ti,ab. (357)

64 or/27-63 (1189079)

65 impact$.ti,ab. (898081)

66 Influen$.ti,ab. (1430306)

67 predict$.ti,ab. (1355997)

68 factor$.ti,ab. (2961285)

69 association?.ti,ab. (1136191)

70 Association/ (3825)

71 cross-sectional.ti,ab. (285291)

72 Cross-Sectional Studies/ (272809)

73 risk.mp. (2205664)

74 Risk/ (115810)

75 (related or relation$).ti,ab. (3455121)

76 correlat$.ti,ab. (1667337)

77 aggregat$.ti,ab. (217177)

78 or/65-77 (9856961)

79 26 and 64 and 78 (1071)

80 animals/ not humans/ (4456014)

81 79 not 80 (991)

***************************

Supplemental Materials Appendix 3: *Variables extracted from articles included in the review.*

| Variable information extracted |
| --- |
| Patient characteristics |
| Sample size |
| Study setting |
| Follow-up period |
| Bullying victimization (yes/no) |
| Type of bullying victimization (physical, verbal, relational victimization, and attacks on property) |
| Mode of bullying victimization (peer, sibling, and cyber) |
| Specific type of peer bullying (sexual, religious, and racial) |
| Co-occurrence of different types of bullying |
| Frequency and stability of bullying victimization |
| Developmental stage during which bullying occurred |
| Presence and type of bullying-related physical harm |
| Pain at baseline |
| Pain outcome measures used to determine pain intensity and incidence |
| Presence of a chronic pain condition |

Supplemental Materials Appendix 4. *QUIPS risk of bias summary. Review authors’ judgments about each risk of bias domain (low, moderate or high) for each study and outcome and the overall rating for each study (low or high).*

| Study | Study participation | Study attrition | Measurement of exposure | Measurement of outcome | Study confounding | Statistical analysis & reporting | Overall rating |
| --- | --- | --- | --- | --- | --- | --- | --- |
| Biebl  201139 | 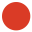 | 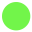 | 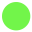 | 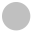 | 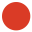 | 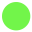 | High |
| Sigurdson  201441 | 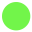 | 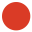 | 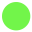 | 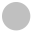 | 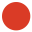 | 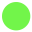 | High |
| 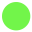 |
| Incledon  201642 | 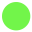 | 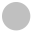 | 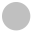 | 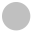 | 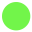 | 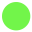 | Low |
| Fekkes  200643 | 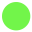 | 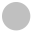 | 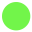 | 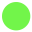 | 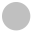 | 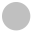 | Low |
| 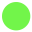 |


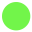
 Low Risk of Bias


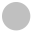
 Moderate Risk of Bias


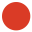
 High Risk of Bias

*Note.* Biebl 2011 and Fekkes 2006 each reported two pain outcomes.

Supplemental Materials Appendix 5: *Grading of Recommendations Assessment, Development and Evaluation (GRADE).*

| **Research question** | **Exposure variable** | **Number of studies (participants)** | **Unadjusted** | | | **Adjusted** | | |  |  | **GRADE Factors** | | | | | | | |
| --- | --- | --- | --- | --- | --- | --- | --- | --- | --- | --- | --- | --- | --- | --- | --- | --- | --- | --- |
| **+** | **0** | **-** | **+** | **0** | **-** | **Number of studies (partici-pants) in meta-analysis** | **Odds ratio (95% CI) for adjusted analysis** | **Study limitations** | **Inconsistency** | **Indirectness** | **Imprecision** | **Publication bias** | **Moderate/large effect size** | **Dose effect** | **Overall quality** |
| *What is the temporal relationship between victimization and pain?* | Victimization | 4 (6275) | 3 | 1 | 0 | 3 | 1 | 0 | 4 (6275) | 1.45 (1.06-1.97) | X | X | X | ✓ | X | X | X | + |
| Pain | 1 (947) | 0 | 1 | 0 | 0 | 1 | 0 | 0 | N/A | ✓ | N/A | X | ✓ | X | X | X | + |
| *Do characteristics of victimization moderate the victimization-pain relationship?* | Victimization type | 1 (70) (relational vs. physical victimization) | 1 | 0 | 0 | 1 | 0 | 0 | 0 | N/A | X | N/A | X | X | X | X | X | + |
| Presence of physical harm | N/A | | | | | | | | | | | | | | | | No evidence |
| Frequent victimization | N/A | | | | | | | | | | | | | | | | No evidence |
| Stable victimization | N/A | | | | | | | | | | | | | | | | No evidence |
| Developmental stage of victimization | N/A | | | | | | | | | | | | | | | | No evidence |

*Note.* For unadjusted and adjusted analyses: +, number of studies with a positive value; 0, number of non-significant effects; -, number of significant effects with a negative value. For GRADE factors, ✓, no serious limitations; X, serious limitations (or not present for moderate/large effect size, dose effect). For overall quality of evidence: +, very low; ++, low; +++, moderate; ++++, high.

Supplemental Materials Appendix 6*. Forest plot depicting the results of a random-effects meta-analysis of longitudinal studies investigating the association between baseline bullying victimization and pain at follow-up, unadjusted for potential confounders.*


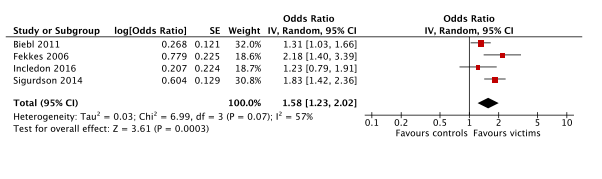


1. * Data from Mynard and Joseph. 57 [↑](#footnote-ref-1)
